# Supplementary material for: Women’s Intentions to Engage in Risk-Reducing Behaviours after Receiving Personal Ovarian Cancer Risk Information: An Experimental Survey Study
Source: MDPI journal article supplement (doi:10.3390/cancers12123543), 2020-11-27
Supplement: s1 [file s1]

# Supplementary Materials: Women's Intentions to Engage in Risk-Reducing Behaviours after Receiving Personal Ovarian Cancer Risk Information: An Experimental Survey Study

Ailish Gallagher, Jo Waller, Ranjit Manchanda, Ian Jacobs and Saskia Sanderson

Table S1. Data for Figure 3.

| Behavioural Intention | <i>n</i> (%)                        |                                |                    |            |
|-----------------------|-------------------------------------|--------------------------------|--------------------|------------|
|                       | <b>Hypothetical Result Received</b> |                                |                    | Total      |
|                       | 5% SNPs & Lifestyle Factors         | 10% SNPs and Lifestyle Factors | 10% BRCA2 Mutation |            |
| Risk-reducing surgery | 95 (27.9)                           | 90 (26.2)                      | 105 (31.4)         | 290 (28.5) |
| Surveillance          | 111 (32.6)                          | 112 (32.7)                     | 122 (36.5)         | 345 (33.9) |
| Lifestyle             | 71 (20.9)                           | 86 (25.1)                      | 56 (16.8)          | 213 (20.9) |
| Do Nothing            | 12 (3.5)                            | 5 (1.5)                        | 6 (1.8)            | 23 (2.3)   |
| Not Sure              | 51 (15.0)                           | 50 (14.6)                      | 45 (13.5)          | 146 (14.4) |

Table S2. Mean EPPM variables by experimental group.

| EPPM Variables                      | Mean (SD)                              |                                           |                                     |
|-------------------------------------|----------------------------------------|-------------------------------------------|-------------------------------------|
|                                     | Group 1<br>5% SNPs & Lifestyle Factors | Group 2<br>10% SNPs and Lifestyle Factors | Group 3<br>10% Rare Genetic Variant |
| Perceived Severity                  | 4.54 (0.58)                            | 4.51 (0.60)                               | 4.51 (0.57)                         |
| Perceived Response Efficacy of RRSO | 4.03 (0.84)                            | 4.01 (0.76)                               | 4.06 (0.75)                         |
| Perceived Response Efficacy of TVU  | 3.64 (0.89)                            | 3.61 (0.86)                               | 3.68 (0.81)                         |
| Perceived Risk                      | 3.51 (0.79)                            | 3.46 (0.86)                               | 3.57 (0.80)                         |
| Self-Efficacy for RRSO surgery      | 3.05 (1.38)                            | 2.91 (1.40)                               | 2.96 (1.24)                         |
| Perceived Control                   | 2.54 (0.85)                            | 2.47 (0.84)                               | 2.49 (0.89)                         |

EPPM: Extended Parallel Processing Model.

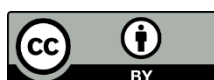

© 2020 by the authors. Licensee MDPI, Basel, Switzerland. This article is an open access article distributed under the terms and conditions of the Creative Commons Attribution (CC BY) license (<http://creativecommons.org/licenses/by/4.0/>).
